# Supplementary material for: Sculpting nanofibers of a bolaamphiphilic peptide through sonication, and quantifying its interaction with anions
Source: Royal Society of Chemistry journal article supplement (doi:10.1039/c3ra42760a), 2013-01-01
Supplement: c3ra42760a.pdf [file c3ra42760a.pdf]

## Supporting Information.

Includes synthesis,  $^1\text{H}$ ,  $^{13}\text{C}$ , DEPT NMR of **1**, MGC data, FTIR, CD, DSC and  $^1\text{H}$ - $^1\text{H}$  COSY of the gel before and after sonication, proposed model of assembly, Jobs plot and individual binding constant vs  $p$  plots for the  $^1\text{H}$  NMR titration of **1** with TBAF and TBACl and other studies.

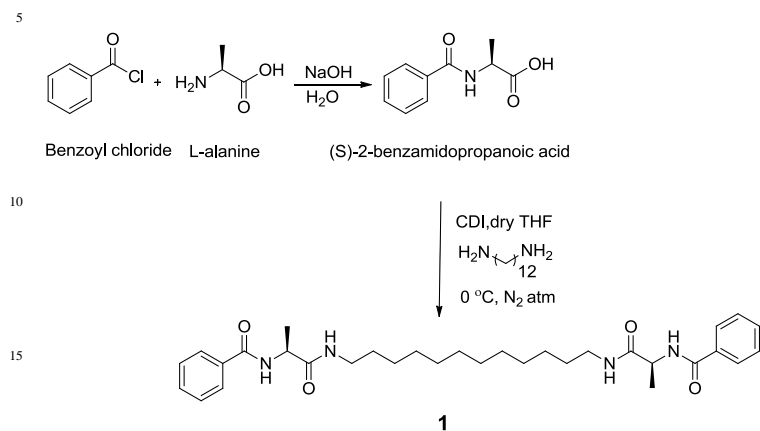

**Scheme S1:** Synthesis of gelator

20 **Synthesis of the bolaaphiphilic peptide (1).** (*S*)-2-benzamidopropanoic acid<sup>1</sup> (2.2 eq, 2.12 g, 11 mmol) and CDI (2.2 eq, 1.78 g, 11 mmol) were taken in dry THF and stirred for 5 min. The 1,12-diamino-dodecane (1 eq, 1 g, 5 mmol) in dry THF was added dropwise at 0 °C to the activated acid solution, and the reaction mixture was stirred for 1.5 h under N<sub>2</sub> atmosphere. The reaction was monitored by TLC (CHCl<sub>3</sub>/MeOH 9.5:0.5 v/v). THF was removed from the reaction mixture by vacuum and 50 mL of CHCl<sub>3</sub>/isopropanol (9:1) was added to it. The organic layer was washed with dil. HCl and sat. NaHCO<sub>3</sub>, and dried over anhyd. sodium sulphate. The solvent was then removed under rotary evaporation to yield the crude **1**, which was purified by

25 column chromatography (stationary phase was silica 100-200 mesh and eluent was CHCl<sub>3</sub>/MeOH 9:1 v/v) to obtain **1** as a white solid (2.5 g, 90%). m.p. 160 °C. FTIR (KBr pellet, cm<sup>-1</sup>): 1637 (amide, C=O str.), 1535 (N-H bend), 3305 (N-H str.).  $^1\text{H}$  NMR (400 MHz, DMSO-d<sub>6</sub>, ppm):  $\delta$ = 1.12-1.24 (16H, (CH<sub>2</sub>)<sub>4</sub>), 1.25-1.31 (6H, CH<sub>3</sub>), 1.32-1.40 (4H, NH-CH<sub>2</sub>-CH<sub>2</sub>), 3.29 (4H, NH-CH<sub>2</sub>), 4.38-4.41 (2H, C-H), 7.40-7.87(10H, Ph-H), 7.80-7.82 (NH<sub>b</sub>), 8.37-8.39 (NH<sub>a</sub>).  $^{13}\text{C}$  NMR (400 MHz, DMSO)  $\delta$ = 172.56, 166.41, 134.60, 131.69, 128.59, 127.96, 49.43, 38.95, 29.47, 29.44, 29.20, 26.74, 18.58. C<sub>32</sub>H<sub>46</sub>N<sub>4</sub>O<sub>4</sub>+Na<sup>+</sup> calc: 573.3411, found: 573.3405.

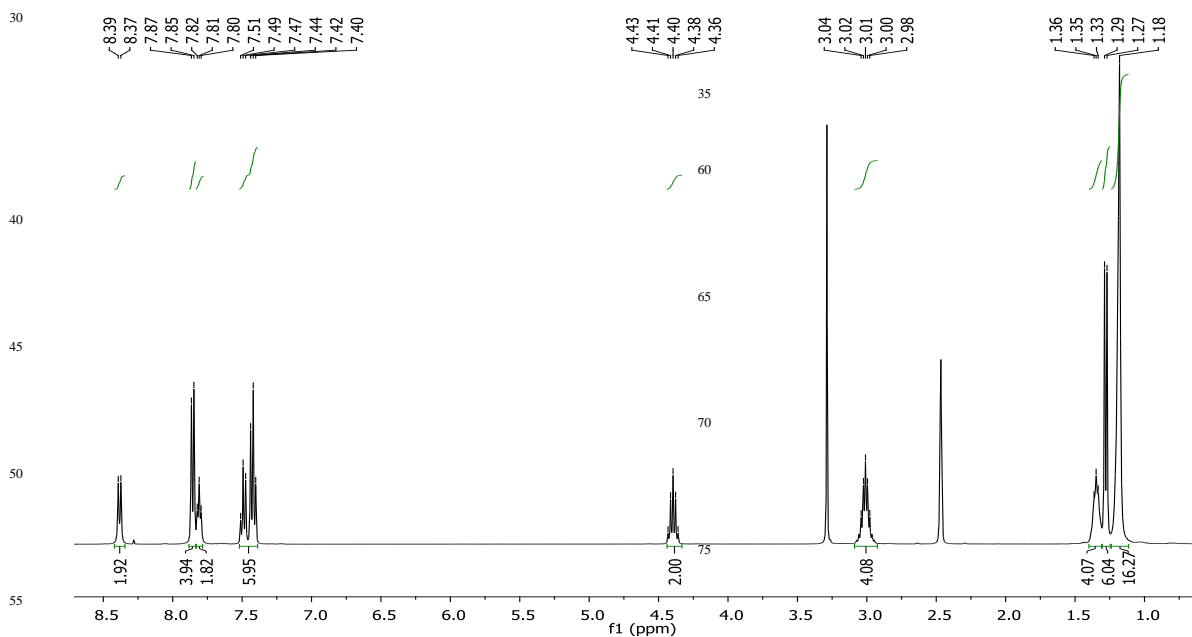

80 **Fig. S1.**  $^1\text{H}$  NMR (400 MHz) spectra of compound **1** in DMSO-d<sub>6</sub>.

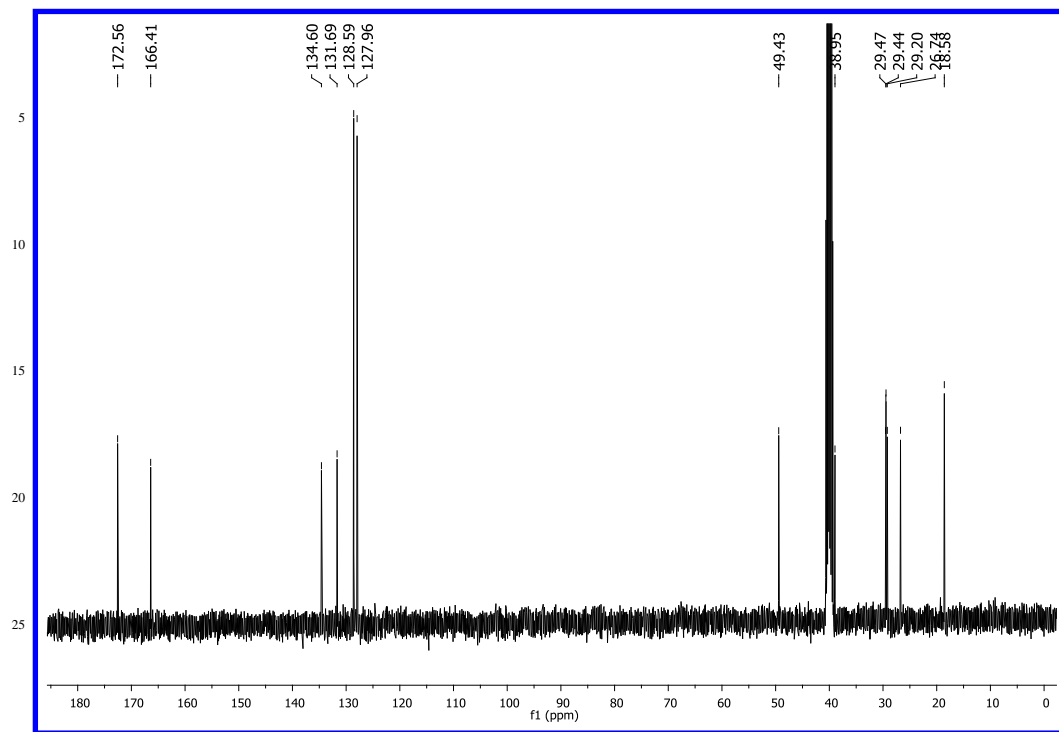

30  
**Fig. S2.**  $^{13}\text{C}$  NMR (100 MHz) spectra of **1** in DMSO- $d_6$ .

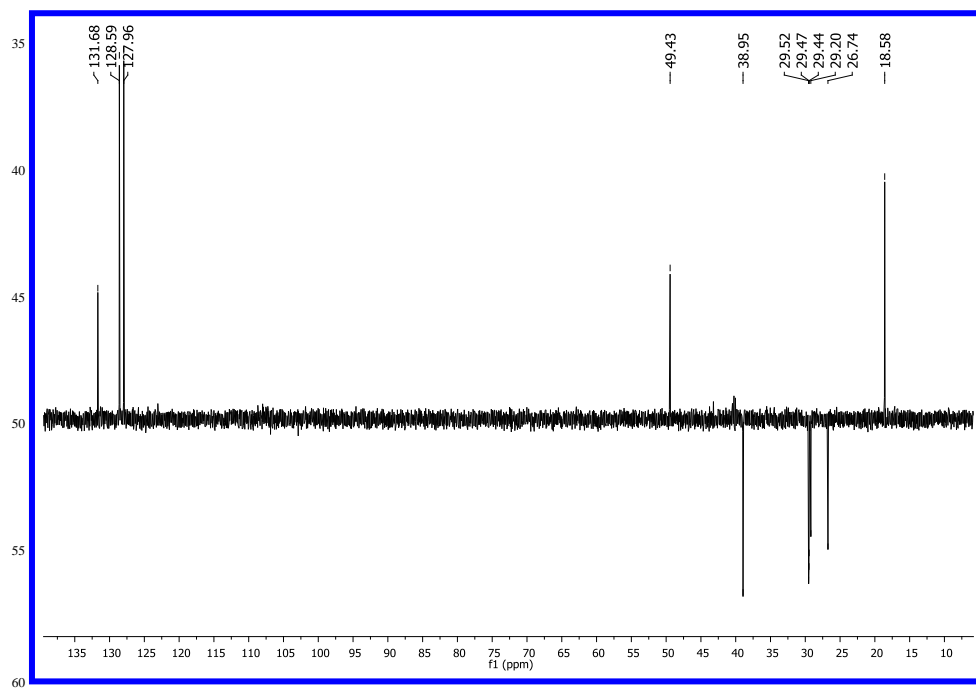

**Fig. S3.** DEPT (100 MHz) spectra of **1** in DMSO- $d_6$ .

| Solvent     | MGC (% w/v) | T <sub>m</sub> (°C) |
|-------------|-------------|---------------------|
| THF         | 1.0         | 45±3                |
| 1,4-Dioxane | 1.5         | 50±2                |

5

**Table S1.** MGC values and melting temperatures (T<sub>m</sub>) at MGC

10

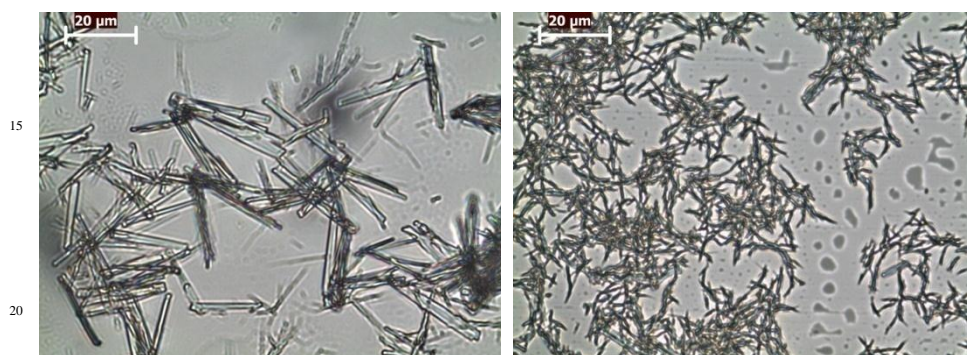

**Fig. S4.** Optical microscopy images (100x magnification) of: a) the microcrystals of 1; b) short fibrils formed after 3 min sonication of the microcrystals

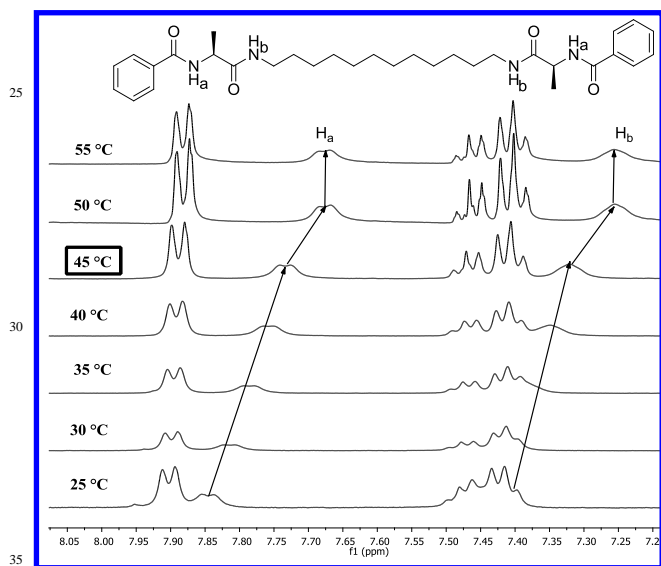

**Fig. S5.** Variable temperature <sup>1</sup>H NMR of the sonication-induced assembly in THF-d<sub>8</sub>. The physical gel-to-sol transition temperature (T<sub>m</sub>) around 45 °C is highlighted.

40

45

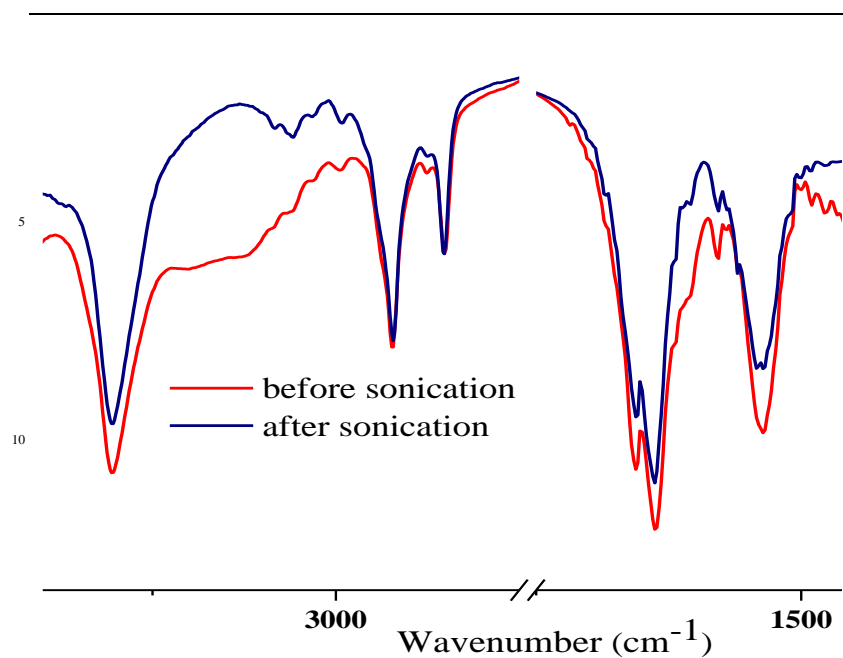

Fig. S6. FTIR spectra of **1** recorded as KBr pellets. Dried microcrystals before sonication (red line), and dried fibrils formed after sonication (blue line).

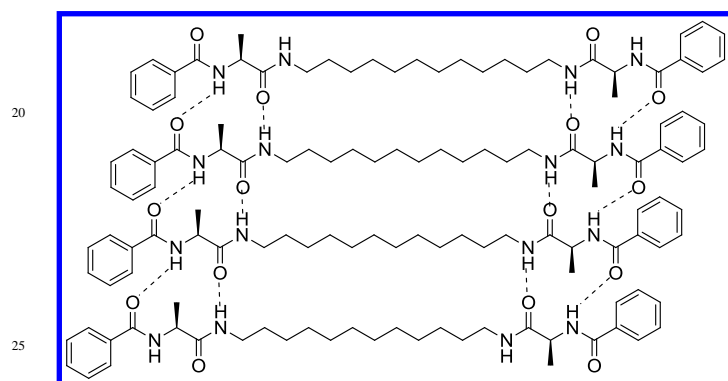

Fig. S7. Proposed model for the assembly of **1** by intermolecular hydrogen bonding interactions between the amide groups.

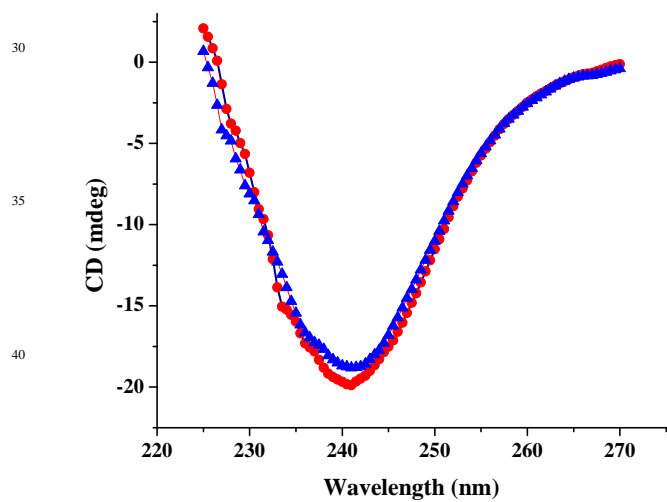

Fig. S8. CD spectra of **1** recorded as a solution in THF (0.75 mg/mL) at 25 °C. Before sonication (red circles), and after sonication (blue triangles).

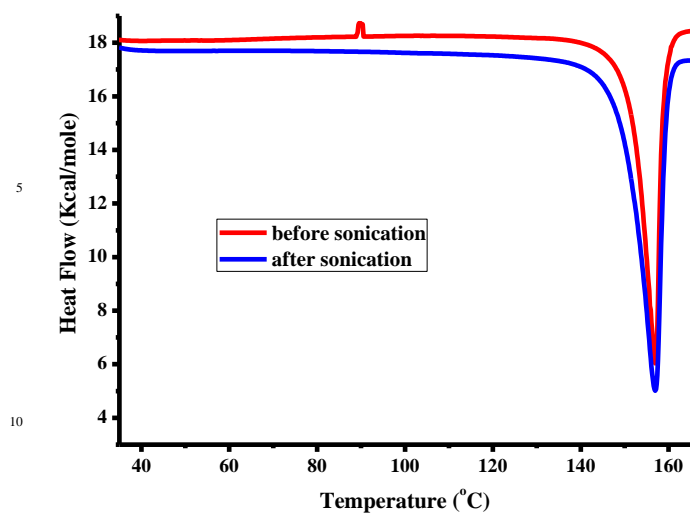

**Fig. S9.** DSC profiles of **1**, as dried microcrystals before sonication (red line), and as dried fibrils formed upon sonication (blue line). 4 mg of pre-dried sample was heated at the scan rate of 1°C/min.

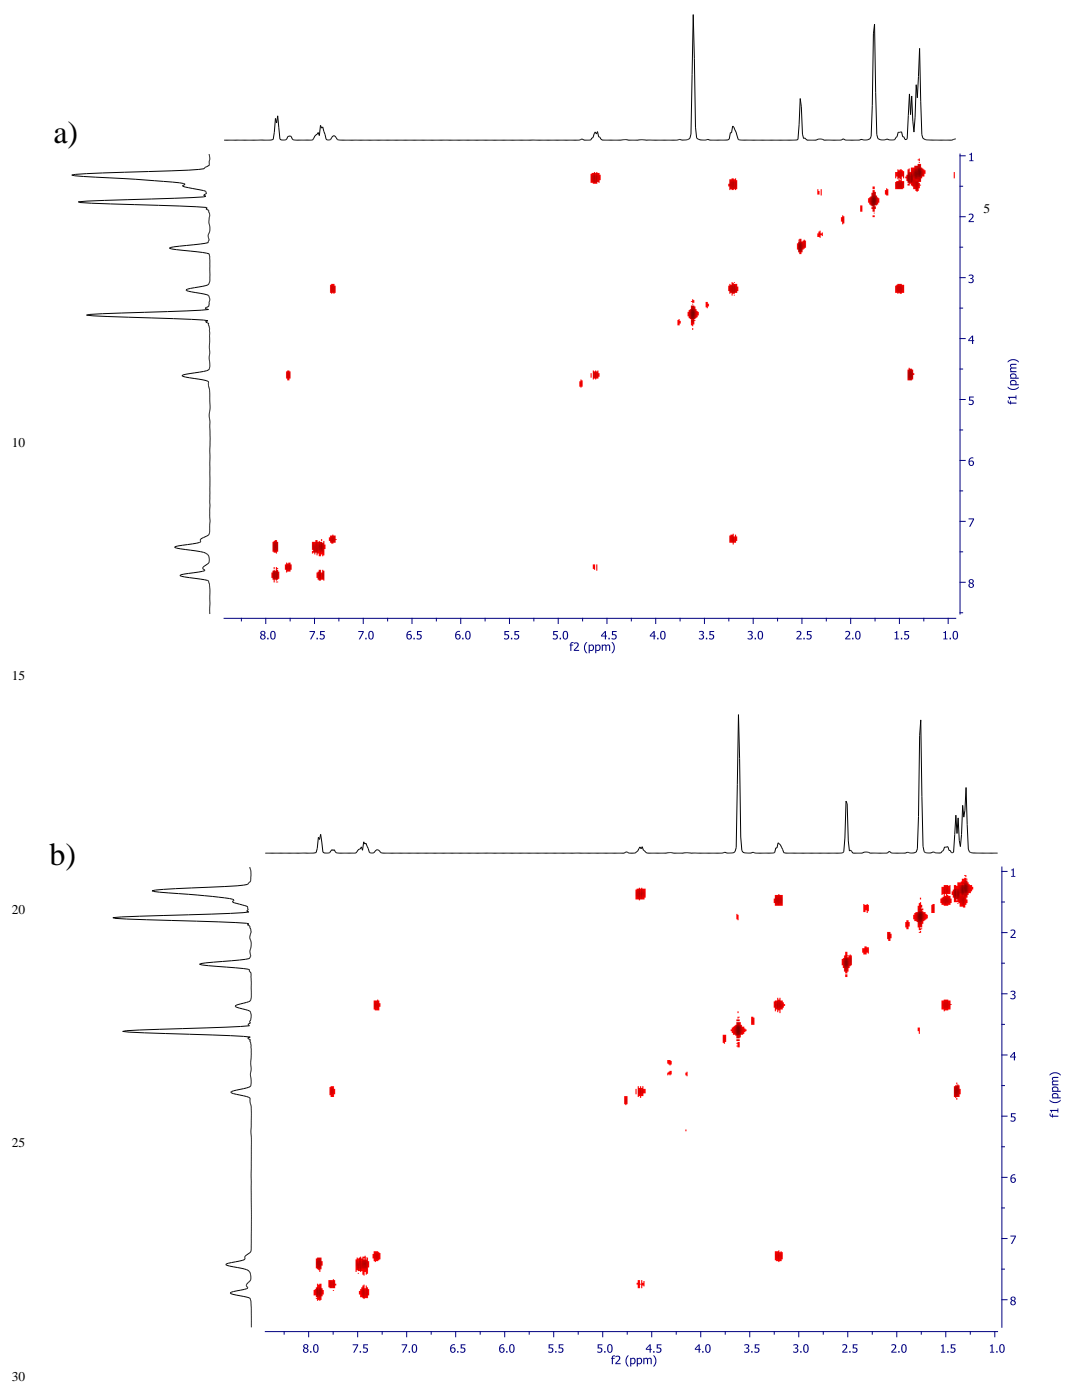

**Fig. S10.**  $^1\text{H}$ - $^1\text{H}$  COSY spectra of **1** (5.5 mM) in THF- $d_8$ . a) before sonication; b) after sonication.

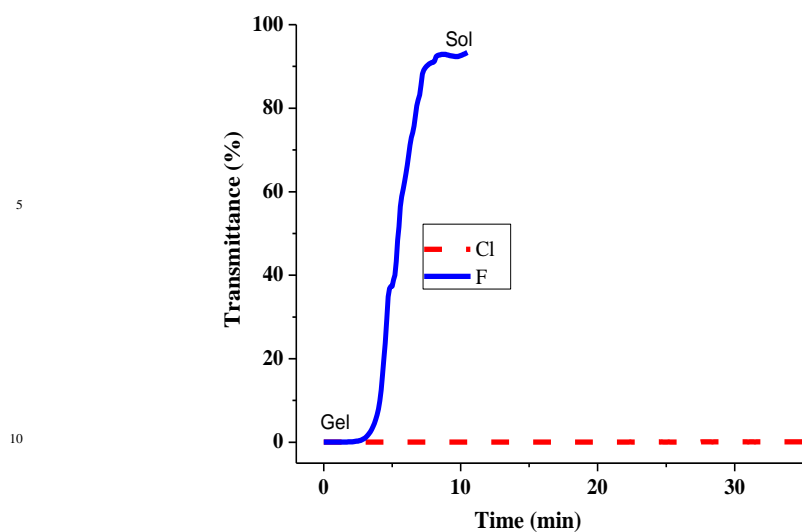

**Fig. S11.** Relative rates of anion-induced disassembly of nanofibers (prepared through sonication of **1** at MGC in THF) by F<sup>-</sup> or Cl<sup>-</sup> ions (4 eqv), as evaluated from the increase in %T at 600 nm.

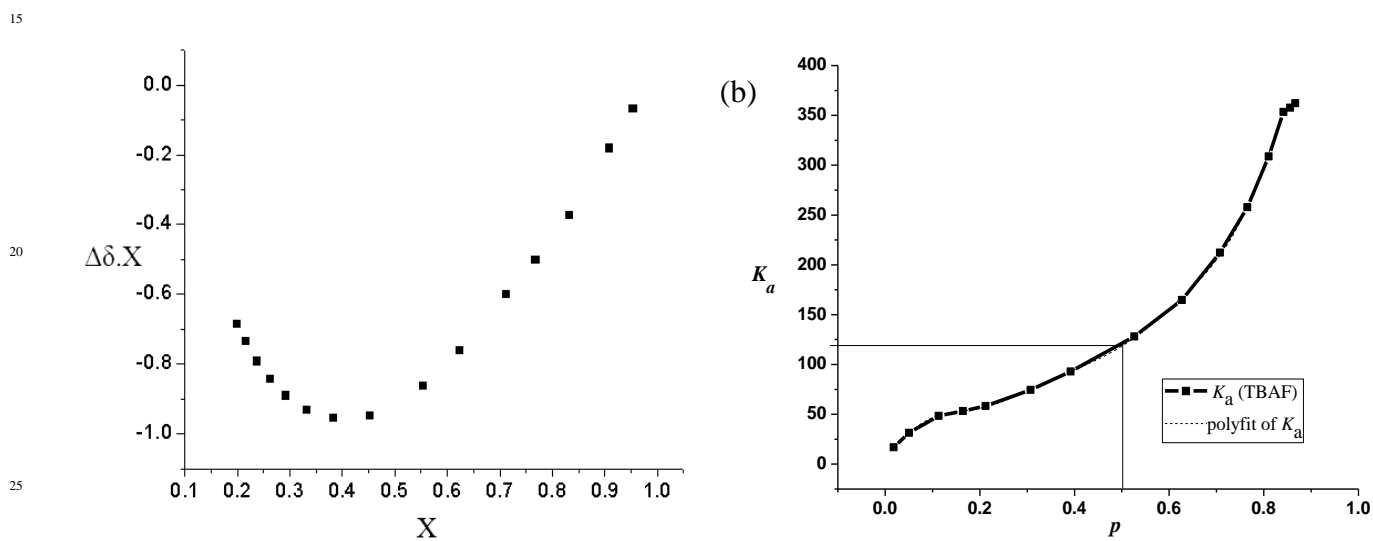

**Fig. S12.** (a) Jobs plot for the chemical shift of NH<sub>3</sub> proton during the titration of TBAF with **1**.  $X$  = mole-fraction of **1**,  $\Delta\delta$  = change in the chemical shift of NH<sub>3</sub> proton. (b)  $K_a$  vs.  $p$  for the NH<sub>3</sub> proton of **1** during NMR titration with TBAF;  $p$  is the probability of complexation (data fitted in polyfit using Origin<sup>TM</sup> 8.0 ( $R^2=0.999$ )).

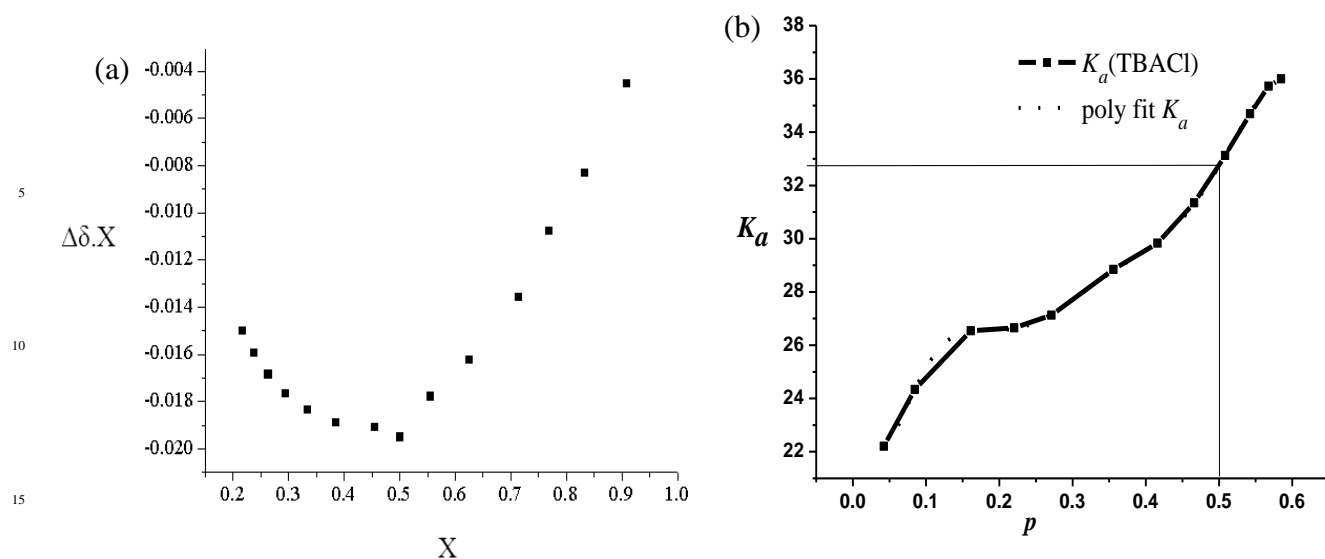

**Fig. S13.** (a) Jobs plot for the chemical shift of  $\text{NH}_a$  proton during titration of TBACl with **1**.  $X$  = mole-fraction of **1**,  $\Delta\delta$  = change in the chemical shift of  $\text{NH}_a$  proton of **1**. (b)  $K_a$  vs.  $p$  for the  $\text{NH}_a$  proton of **1** during NMR titration with TBACl;  $p$  is the probability of complexation (data fitted in polyfit using Origin™ 8.0 ( $R^2=0.999$ )).

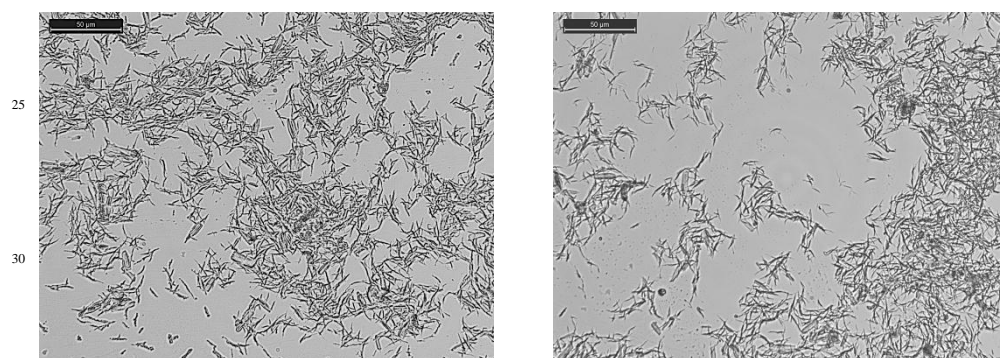

**Fig S14:** Optical microscopy images (40x magnification) of the regenerated gel exhibiting fibrous architecture similar to the pristine gel (scale 50  $\mu\text{m}$ ).

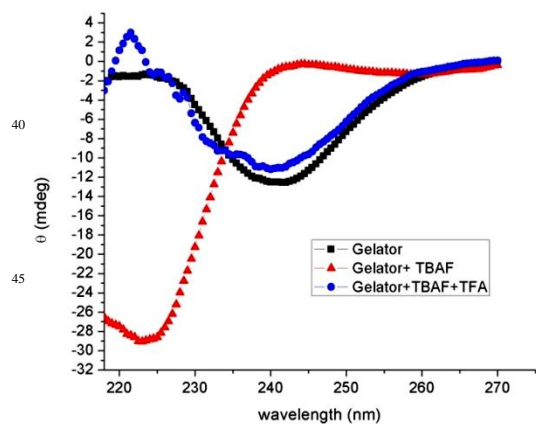

**Fig S15:** CD profiles of TFA regenerated gel showing the regeneration of the CD signal similar to the pristine gelator.

(1) A.I. Vogel, A.R. Tatchell, B.S. Furnis, A.J. Hannaford, P.W.G. Smith, in *Vogel's Textbook of Practical Organic Chemistry*, (5th ed.) Longman Group Ltd., London **1989** pp. 815.
